# Supplementary material for: Synthesis of Bis(cyclic carbonates) from Epoxy Resin under Microwave Irradiation: The Structural Analysis and Evaluation of Thermal Properties
Source: MDPI journal article supplement (doi:10.3390/molecules29010250), 2024-01-03
Supplement: s1 [file s1]

**Table S1.** The calculated and measured parameters for the CC calibration.

| <b>m<sub>pCC</sub></b><br>[g] | <b>m<sub>E6</sub></b><br>[g] | <b>CC<sub>cont</sub></b><br>mol pCC/100g | <b>A<sub>1786</sub></b><br>[%T] | <b>AVG spectrum</b><br>[%T] | <b>NA<sub>1786</sub></b><br>[%T] |
|-------------------------------|------------------------------|------------------------------------------|---------------------------------|-----------------------------|----------------------------------|
| 0.029                         | 1.996                        | 0.014027806                              | 0.364                           | 0.0472                      | 7.71                             |
| 0.255                         | 1.763                        | 0.123775821                              | 8.795                           | 0.0471                      | 186.60                           |
| 0.478                         | 1.552                        | 0.230647449                              | 15.723                          | 0.0462                      | 340.61                           |
| 0.724                         | 1.303                        | 0.349865898                              | 21.807                          | 0.0471                      | 463.48                           |
| 0.916                         | 1.017                        | 0.464173578                              | 25.054                          | 0.0433                      | 578.10                           |
| 1.116                         | 0.873                        | 0.549599347                              | 30.827                          | 0.0470                      | 655.87                           |
| 1.366                         | 0.636                        | 0.668349184                              | 35.444                          | 0.0467                      | 759.73                           |
| 1.599                         | 0.431                        | 0.771559143                              | 39.389                          | 0.0469                      | 840.21                           |

**m<sub>pCC</sub>** – mass content of propyl carbonate, **m<sub>E6</sub>** – mass content of Epidian 6, **CC<sub>cont</sub>** – the molar amount of cyclic carbonate groups per 100 g of the mixture, **A<sub>1786</sub>** – the area of C=O peak (1786 cm<sup>-1</sup>) for each measuring point, **AVG spectrum** – the average value of the full spectrum, **NA<sub>1786</sub>** – normalized A<sub>1786</sub> by dividing with average spectrum. Blue-colored columns were taken to the graph.

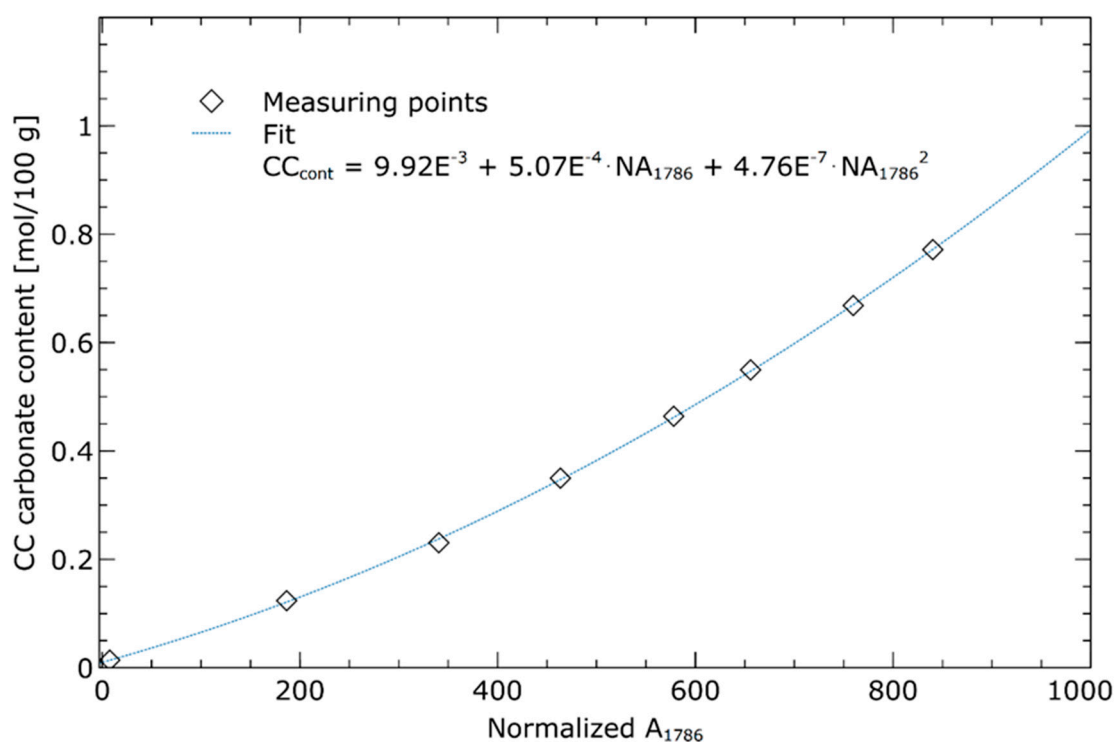

**Figure S1.** The calibration curve for the CC content estimation via FTIR method.
